# Supplementary material for: Is there an Exposure–Response Relationship for Nivolumab in Real-World NSCLC Patients?
Source: MDPI journal article supplement (doi:10.3390/cancers11111784), 2019-11-13
Supplement: s1 [file s1]

## Supplementary Materials

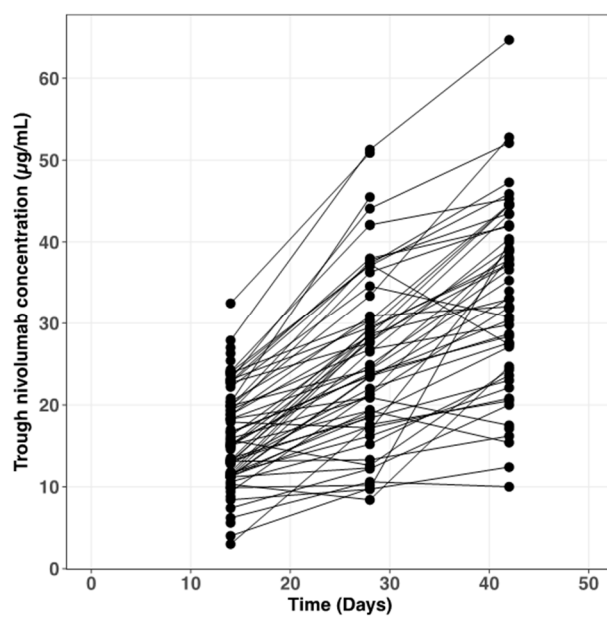

**Figure S1.** plasma trough concentration of nivolumab ( $n = 81$  patients) within the 42 first days of treatment.
